# Supplementary material for: Dietary Patterns and Obesity in Chinese Adults: A Systematic Review and Meta-Analysis
Source: MDPI journal article supplement (doi:10.3390/nu14224911), 2022-11-20
Supplement: s1 [file s1]

**Supplementary Table S1. Detailed summary of characteristics of included studies on dietary patterns and obesity or weight outcomes**

| Number                   | Pattern                                                                                                                                                                                                                                                                                   | Study Type      | Participants        | Population                                                                                      | Outcome                         | Adjusted variables                                                                                               | Food Measurements  | Findings                                                                                                                                                                                                                                                                                                                                                                                                                                                            |
|--------------------------|-------------------------------------------------------------------------------------------------------------------------------------------------------------------------------------------------------------------------------------------------------------------------------------------|-----------------|---------------------|-------------------------------------------------------------------------------------------------|---------------------------------|------------------------------------------------------------------------------------------------------------------|--------------------|---------------------------------------------------------------------------------------------------------------------------------------------------------------------------------------------------------------------------------------------------------------------------------------------------------------------------------------------------------------------------------------------------------------------------------------------------------------------|
| Cao et al. 2020 [50]     | Trajectory of the “Traditional” DP with rice, meat, and vegetables; “modern” DP with fast food, milk, and deep-fried food over the survey collection period                                                                                                                               | Longitudinal    | 6,943 (48.4% males) | Adults aged over 20 years in the China Health and Nutrition Survey (CHNS) between 1991 and 2009 | BMI, overweight/obesity in 2009 | Age, gender, education, income, urbanization, smoking, alcohol drinking, physical activity                       | 3-day 24 hr recall | High and stable traditional DP trajectory: lower BMI ( $\beta = -1.14$ ; 95% CI: -1.41, -0.87); high and rapid increase in the modern DP: higher BMI ( $\beta = 0.74$ ; 95% CI: 0.34, 1.15).                                                                                                                                                                                                                                                                        |
| Cempaka et al. 2019 [32] | “Dysregulated iron metabolism related” DP with high intake of deep-fried food, processed meats, chicken, pork, eating out, coffee, and animal fat/skin but low intake of steamed/boiled/raw foods and dairy products                                                                      | Cross-sectional | 208 (50.4% males)   | Taiwanese adults aged 20–65 years                                                               | Central obesity, fat mass       | Age, gender, and body-mass index                                                                                 | FFQ                | Central obesity (OR = 1.57; 95% CI: 1.05, 2.34); Visceral fat mass (%) ( $\beta = 0.23$ ; 95% CI: 0.011, 0.453)                                                                                                                                                                                                                                                                                                                                                     |
| Chan et al. 2012 [33]    | “Vegetables–fruit” DP with vegetables, fruits, legumes, soya and soya products; “snacks–drinks–milk products” DP with condiments, coffee, fast food, French fries, potato chips, nuts, and milk products; “meat–fish” DP with dim sum, red and processed meats, poultry, fish and seafood | Cross-sectional | 3,707 (52.5% males) | Adults aged 65 years and above living in Hong Kong                                              | BMI, WC, HC, waist-to-hip ratio | Age, PASE, daily energy intake, education level, Hong Kong ladder, community ladder, alcohol use, smoking status | FFQ                | meat–fish DP: higher BMI ( $\beta = 0.19$ , 95 % CI: 0.06, 0.33), waist-to-hip ratio ( $\beta = 0.004$ , 95 % CI: 0.002, 0.007), and WC ( $\beta = 0.57$ , 95 % CI: 0.18, 0.97) in men, and higher BMI ( $\beta = 0.40$ , 95 % CI: 0.22, 0.57), WC ( $\beta = 0.87$ , 95 % CI: 0.39, 1.36) and HC ( $\beta = 0.61$ , 95 % CI: 0.26, 0.96) in women; “snacks–drinks–milk products” DP: lower waist-to-hip ratio ( $\beta = -0.004$ , 95 % CI: -0.007, -0.001) in men |

|                       |                                                                                                                                                                                                                                 |                 |                     |                                                                                   |                                                                             |                                                                                                                                                                                                                                                                                                                                              |                    |                                                                                                                                                                                                                                                                                       |
|-----------------------|---------------------------------------------------------------------------------------------------------------------------------------------------------------------------------------------------------------------------------|-----------------|---------------------|-----------------------------------------------------------------------------------|-----------------------------------------------------------------------------|----------------------------------------------------------------------------------------------------------------------------------------------------------------------------------------------------------------------------------------------------------------------------------------------------------------------------------------------|--------------------|---------------------------------------------------------------------------------------------------------------------------------------------------------------------------------------------------------------------------------------------------------------------------------------|
| Chen et al. 2021 [34] | "Lacto-ovo-vegetarian" DP with tubers, vegetables, eggs, dairy products; "meat-fish" DP with meat, fish and seafood; junk food DP with fried food, desserts, beverages                                                          | Cross sectional | 3,795 (37.2% males) | Community-dwelling older adults aged over 60 years in Shenyang, Liaoning province | Sarcopenic obesity, WC, obesity                                             | The two other dietary patterns, age, sex, education level, cohabitation status, marital status, history of falls in the past year, exercise status, hemoglobin, alanine aminotransferase, triacylglycerols, high-density lipoprotein cholesterol, low-density lipoprotein cholesterol, fasting blood glucose, free triiodothyronine, and FT4 | FFQ                | Lacto-ovo-vegetarian DP: lower risk of sarcopenic obesity (OR = 0.79, 95% CI: 0.65, 0.97) ; no association with WC                                                                                                                                                                    |
| Li et al. 2017 [51]   | Mean cumulative DP scores during 1991-2011 of "Traditional" DP with rice, meat, and vegetables; "modern" DP with fast food, milk, and deep-fried food                                                                           | Longitudinal    | 9,499 (48% males)   | CHNS between 1991 and 2011                                                        | Overweight/obesity (BMI > 25 kg/m <sup>2</sup> ); abdominal obesity in 2009 | Urbanization, education, income, smoking, physical activity, alcohol                                                                                                                                                                                                                                                                         | 3-day 24 hr recall | Traditional DP: lower risk of obesity ( $\beta$ = -0.10, 95 % CI: 0.013, 0.07) and abdominal obesity ( $\beta$ = -0.13, 95 % CI: -0.16, -0.10); Modern DP: higher risk of obesity ( $\beta$ = 0.16, 95 % CI: 0.13, 0.19) and abdominal obesity ( $\beta$ = 0.12, 95 % CI: 0.09, 0.15) |
| Li et al. 2022 [35]   | "Animal-based and processed food" DP with refined rice and noodle, meat and aquatic products; "traditional food" DP with whole grains, vegetables, and legumes; and "ovo-lacto vegetarian food" DP with dairy, fruits, and eggs | Cross sectional | 1,136 (100% males)  | Males aged over 65 years in Sichuan province                                      | BMI, overweight/obesity, WC                                                 | Age, living status, education level, smoking status, alcohol consumption, and total energy intake                                                                                                                                                                                                                                            | FFQ                | Traditional DP: lower risk of overweight/obesity (OR = 0.51, 95% CI: 0.36, 0.72); animal-based and processed food DP: higher risk of overweight/obesity (OR = 3.25, 95% CI: 1.94, 5.46)                                                                                               |

|                       |                                                                                                                                                                                                                                                                                                                                                                                                             |                 |                     |                                                                                                                         |                    |                                                                                           |     |                                                                                                                                                                                                                                                              |
|-----------------------|-------------------------------------------------------------------------------------------------------------------------------------------------------------------------------------------------------------------------------------------------------------------------------------------------------------------------------------------------------------------------------------------------------------|-----------------|---------------------|-------------------------------------------------------------------------------------------------------------------------|--------------------|-------------------------------------------------------------------------------------------|-----|--------------------------------------------------------------------------------------------------------------------------------------------------------------------------------------------------------------------------------------------------------------|
| Meng et al. 2014 [36] | <p>“Western food” DP with meat, processed meat, poultry, and beverages;</p> <p>“high protein and calcium” DP with soy products, dairy, and eggs;</p> <p>“fruits and snacks” DP with fruits, seafood, eggs, and snacks;</p> <p>“staple food and vegetables” DP with staple food and vegetables</p>                                                                                                           | Cross sectional | 1,535 (47.4% males) | Adults aged > or = 18 years old in Shanghai                                                                             | Overweight/obesity | Age, gender and degree of education                                                       | FFQ | Staple food and vegetables DP: higher risk of obesity (OR = 2.67)                                                                                                                                                                                            |
| Mu et al. 2014 [37]   | <p>“Western food” DP with hamburger and fried food, nuts, snack food, cola, coffee, sugars; "high protein and calcium" DP with pork, mutton, beef, poultry meat, animal liver; "Calcium food" pattern with milk and dairy products, beans and bean products, fresh fruit, eggs, fish and shrimp, kelp laver, and sea fish; "Chinese traditional" pattern with grains, fresh vegetables and fruits, pork</p> | Cross sectional | 1,319 (38.7% males) | College freshmen aged 16-20 years in Anhui province                                                                     | Overweight/obesity | Sex, physical activity, economic status, passive smoking, drinking, calcium supplements   | FFQ | Western food DP: higher risk of overweight/obesity (OR = 2.00, 95% CI: 1.24-3.22); traditional DP: lower risk of overweight/obesity (OR = 0.65, 95% CI: 0.53, 0.80).                                                                                         |
| Muga et al. 2017 [38] | “Vegetable-fruit” DP rich in fruits and vegetables, meat-processed dietary pattern rich in meat and processed food                                                                                                                                                                                                                                                                                          | Cross sectional | 62,965 (52% males)  | Taiwanese adults aged over 40 years in the Mei Jau health screening institutions' database collected from 2001 and 2010 | Overweight/obesity | Age, education level, marital status, smoking, drinking, physical activity, CVD, SBP, DBP | FFQ | Vegetable-fruit DP: lower risk of being overweight (OR = 0.91; 95% CI: 0.85, 0.97) or obese (OR = 0.85; 95% CI: 0.78, 0.92); meat and processed DP: higher risk of being overweight (OR = 1.50; 95% CI: 1.40, 1.59) or obese (OR = 1.94; 95% CI, 1.79, 2.10) |

|                      |                                                                                                                                                                                                                                                                                                                                                                                                                                     |                 |                     |                                                                |                                                      |                                                                                                                                |     |                                                                                                                                                                                                                                                                                                                                                                       |
|----------------------|-------------------------------------------------------------------------------------------------------------------------------------------------------------------------------------------------------------------------------------------------------------------------------------------------------------------------------------------------------------------------------------------------------------------------------------|-----------------|---------------------|----------------------------------------------------------------|------------------------------------------------------|--------------------------------------------------------------------------------------------------------------------------------|-----|-----------------------------------------------------------------------------------------------------------------------------------------------------------------------------------------------------------------------------------------------------------------------------------------------------------------------------------------------------------------------|
| Shi et al.2008 [39]  | <p>“Traditional” DP with rice, fresh vegetables, pork and wheat flour; “vegetable-rich” DP with whole grains, fruits, root vegetables, fresh and pickled vegetables, milk, eggs and fish; “macho” DP with meat and alcohol; “sweet tooth” DP with drinks and cake</p>                                                                                                                                                               | Cross sectional | 2,849 (45.9% males) | Adults aged over 20 years in the Jiangsu Nutrition Study (JIN) | Overweight/obesity                                   | Age, income, education, occupation, active commuting, smoking, drinking, energy intake                                         | FFQ | Vegetable-rich DP: higher risk of general obesity (PR = 2.06, 95% CI: 1.46, 2.89)                                                                                                                                                                                                                                                                                     |
| Shi et al.2011 [52]  | <p>“Traditional” DP with rice, fresh vegetables, pork and wheat flour; vegetable-rich DP; “macho” DP with meat and alcohol; “sweet tooth” DP with drinks and cake assessed at baseline</p>                                                                                                                                                                                                                                          | Longitudinal    | 1,231 (41.4% males) | JIN 2002-2007                                                  | Weight gain during the survey period                 | Age, sex, education, occupation, active commuting, leisure-time physical activity, smoking and alcohol drinking, energy intake | FFQ | Traditional DP: lower weight gain ( $\beta$ = - 2.18, 95 % CI: - 2.91, - 1.45); Vegetable rich DP: greater weight gain ( $\beta$ = 1.00, 95 % CI: 0.25, 1.74)                                                                                                                                                                                                         |
| Shu et al. 2015 [40] | <p>“Animal food” DP with rice, mushrooms, red meat, fish, seafood, fat/oils; “traditional Chinese” DP with rice, coarse grains, steamed bun/noodles, tubers, fresh fruits and vegetables, fish and shrimp, and Miscellaneous bean, tea; “western fast-food” DP with fast foods, snacks, chocolates, coffee and drinks; “high-salt” DP with pickled vegetables, processed and cooked meat, bacon and salted fish, and bean sauce</p> | Cross sectional | 2,560 (53% males)   | Adults aged 45-60 years from Zhejiang province                 | BMI, WC, waist to hip ratio (WHR), abdominal obesity | Age, smoking status, economic income, educational level, physical activity level, and total energy intake                      | FFQ | Animal DP: higher BMI ( $r$ = 0.08, 0.14, for men and women respectively) and WC ( $r$ = 0.10, 0.13), higher risk of abdominal obesity (OR=1.67, 95% CI: 1.19, 2.34); traditional Chinese DP: lower BMI ( $r$ = -0.05, - 0.12) and WC ( $r$ = -0.07, - 0.11), lower risk of abdominal obesity (OR = 0.63; 95% CI: 0.44, 0.90); Western DP not associated with obesity |

|                       |                                                                                                                                                                                                                                                                                                      |                 |                      |                                                           |                                                 |                                                                                                                              |                  |                                                                                                                                                                                                                                                                                                                                                                                                                                                                                                                                                                                                                                                                                  |
|-----------------------|------------------------------------------------------------------------------------------------------------------------------------------------------------------------------------------------------------------------------------------------------------------------------------------------------|-----------------|----------------------|-----------------------------------------------------------|-------------------------------------------------|------------------------------------------------------------------------------------------------------------------------------|------------------|----------------------------------------------------------------------------------------------------------------------------------------------------------------------------------------------------------------------------------------------------------------------------------------------------------------------------------------------------------------------------------------------------------------------------------------------------------------------------------------------------------------------------------------------------------------------------------------------------------------------------------------------------------------------------------|
| Wang et al. 2021 [41] | “Traditional” DP with poultry, light-colored vegetables, red meat and its products, cereals and tubers products, condiment, oils and dark-colored vegetables; “fruit-egg” DP with fruit, whole grains, pickled vegetables and eggs and eggs products; “nut-wine” DP with nut, wine and pastry snacks | Cross sectional | 1,739 (46.2% males)  | Adult participants aged over 18 years in Jiangsu province | Overweight/obesity                              | Energy intake, age group, education level, job, smoking and income status                                                    | FFQ              | Traditional DP: higher risk of overweight and obesity in men (OR = 1.95; 95% CI: 1.26, 3.04; $\beta$ = 0.12) but not in women                                                                                                                                                                                                                                                                                                                                                                                                                                                                                                                                                    |
| Xu et al. 2015 [42]   | “Traditional” DP with high intake of rice, pork and vegetables; “modern” DP with high intake of fruit, fast food, and processed meat                                                                                                                                                                 | Cross sectional | 2,745 (47.4 % males) | 2009 CHNS participants aged $\geq$ 60 years               | Obesity                                         | Age, marital status, work status, education level, smoking, physical activity, the other DP, and energy                      | 3-d food recalls | Traditional DP: lower risk of overweight (RRR = 0.64, 95% CI: 0.45, 0.92) and general obesity (RRR = 0.66, 95% CI: 0.34, 1.27); Modern DP: higher risk of central obesity (PR=1.42, 95% CI:1.10, 1.67) in men, as well as lower risk of underweight (PR = 0.24, 95% CI: 0.09; 0.63) in women<br>Traditional DP: greater BMI decrease ( $\beta$ = -0.23, 95 % CI: -0.44, -0.02), weight decrease ( $\beta$ = -0.90, 95 % CI: -1.42, -0.37); and WC decrease ( $\beta$ = -1.57, 95 % CI: -2.32; -0.83). Modern DP: BMI increase ( $\beta$ = 0.29, 95 % CI: 0.12; 0.47); weight increase ( $\beta$ = 1.02, 95 % CI: 0.58; 1.46); WC increase ( $\beta$ = 1.44, 95 % CI: 0.78, 2.10) |
| Xu et al. 2016 [53]   | “Traditional” and “modern” DP as above in four survey years                                                                                                                                                                                                                                          | Longitudinal    | 6,348 (47.3% males)  | CHNS 2004-2011 waves of participants aged $\geq$ 60 years | BMI, weight and WC changes in four survey years | Age, urbanization, gender, marital status, work status, education level, smoking, physical activity, the other DP and energy | 3-d food recalls |                                                                                                                                                                                                                                                                                                                                                                                                                                                                                                                                                                                                                                                                                  |

|                        |                                                                                                                                                                                                                                                                                                                                                                                                                          |                 |                     |                                                                                                                          |                                           |                                                                                                                                               |     |                                                                                                                                                                                                                                                                                   |
|------------------------|--------------------------------------------------------------------------------------------------------------------------------------------------------------------------------------------------------------------------------------------------------------------------------------------------------------------------------------------------------------------------------------------------------------------------|-----------------|---------------------|--------------------------------------------------------------------------------------------------------------------------|-------------------------------------------|-----------------------------------------------------------------------------------------------------------------------------------------------|-----|-----------------------------------------------------------------------------------------------------------------------------------------------------------------------------------------------------------------------------------------------------------------------------------|
| Ye et al. 2018 [43]    | "Healthy traditional" DP with vegetables, rice and products, fish and shrimp; "animal and plant protein" DP with poultry meat, dry beans, other soyabean products and livestock meat; "condiments" DP with soya sauce, sugar, vinegar and salt; "fruits, eggs, and juice" DP with fruits, eggs, soyabean milk, juice, nuts, cola and sweets; "alcohol, milk and tea" DP with beer, liquor, dairy products, wine and tea. | Cross sectional | 3,376 (41.4% males) | Adult participants aged over 35 years in a community-based nutrition and health survey in 2007 in urban areas of Nanjing | Abdominal obesity                         | Age, sex, education level, family annual income, smoking status and alcohol consumption                                                       | FFQ | Healthy traditional DP: lower risk of abdominal obesity (OR = 0.52; 95 % CI: 0.41, 0.67).                                                                                                                                                                                         |
| Yu et al. 2015 [44]    | "Traditional south" DP with high rice and low wheat intakes; "traditional north" DP with high wheat but low rice, meat, poultry, fish and fresh fruit intakes; "Western" DP with fresh fruit and protein products                                                                                                                                                                                                        | Cross sectional | 474,192 (59% males) | Adults aged 30–79 years from the China Kadoorie Biobank                                                                  | BMI, WC, general obesity, central obesity | Age, sex, study area, marital status, education level, household income, alcohol consumption, smoking status, and physical activity           | FFQ | Traditional southern DP: lower risk; Traditional north DP: general obesity: (PR = 1.05, 95% CI: 1.02, 1.09) and central obesity (PR = 1.17, 95% CI, 1.15, 1.18); Western DP: general obesity: (PR = 1.06, 95% CI: 1.03, 1.08) and central obesity (PR = 1.07, 95% CI: 1.06, 1.08) |
| Zhang et al. 2012 [45] | "Vegetable" DP with vegetables, fruits, tubers, and starches; "sweets and fats" DP with sugars and preserves, condiments, and oil; "legume" DP with beancurds, legumes, eggs, organ meat, and coarse cereals; and "poultry, beef and mutton" DP with poultry, beef and mutton, fruits, tubers and starches, coarse cereals, organ meat, and condiments                                                                   | Cross sectional | 556 (50.5% males)   | Newlywed couples aged under 35 years in Shanghai                                                                         | Weight gain                               | Age, sex, smoking and alcohol consumption, education, physical activity, staying up late, living with parents and body weight before marriage | FFQ | Sweets and fats DP: more weight gain after marriage ( $\beta$ = 2.94; 95 % CI: 0.75, 5.15; P = 0.01) in men; poultry, beef and mutton DP: less weight gain after marriage ( $\beta$ = -1.21; 95 % CI: -2.32, -0.11; P = 0.03)                                                     |

|                        |                                                                                                                                                                                                                                     |                 |                      |                                                                                                 |                                                      |                                                                                                                                                        |                  |                                                                                                                                                                                                                                                                                                                                                                                                                                                                                                                                                                                                     |
|------------------------|-------------------------------------------------------------------------------------------------------------------------------------------------------------------------------------------------------------------------------------|-----------------|----------------------|-------------------------------------------------------------------------------------------------|------------------------------------------------------|--------------------------------------------------------------------------------------------------------------------------------------------------------|------------------|-----------------------------------------------------------------------------------------------------------------------------------------------------------------------------------------------------------------------------------------------------------------------------------------------------------------------------------------------------------------------------------------------------------------------------------------------------------------------------------------------------------------------------------------------------------------------------------------------------|
| Zhang et al. 2014 [46] | “Animal food” DP with meat, snacks, and sugar sweetened beverages; “plant food” DP with non-starchy vegetables, mushrooms, beans, and starchy vegetables; “seafood” DP with fish, seafood, fruits, eggs, snacks, and dairy          | Cross sectional | 2,116 (46.6% males)  | Adults aged over 18 years in the "China National Nutrition and Health Status Monitoring" cohort | Abdominal obesity                                    | Age, sex, marital status, education, family income, smoking, alcohol drinking, family history of chronic diseases                                      | FFQ              | Increased risks of abdominal obesity with animal food pattern (OR = 1.88), inverse association with seafood pattern (OR = 0.83)                                                                                                                                                                                                                                                                                                                                                                                                                                                                     |
| Zhang et al. 2015 [47] | “Traditional south” DP with rice, vegetables, and pork; “traditional north” DP with wheat, other cereals, and tubers; “snack” DP with fruits, eggs, milk, and nuts; and “high protein” DP with fungi, algae, legume, seafoods, pork | Cross sectional | 2,363 (100% females) | Women aged 18-44 years in the 2011 CHNS                                                         | obesity, BMI, WC                                     | Age, education, living area, smoking status, drinking status, physical activity, annual household incomes per family member and total energy intake    | 3-d food recalls | Traditional south DP: lower risk of general obesity (OR = 0.48; 95% CI: 0.29, 0.78) and abdominal obesity (OR = 0.64; 95% CI: 0.46, 0.90); traditional north DP: greater risk of general obesity (OR = 2.28; 95% CI: 1.38, 3.74) and abdominal obesity (OR = 2.32; 95% CI: 1.66, 3.24) Modern DP: higher risk of general and central obesity (OR = 1.95, 95% CI: 1.15, 3.48; OR = 2.01, 95% CI: 1.37, 2.93); tuber pattern: lower risk of general and central obesity (OR = 0.34, 95% CI: 0.15, 0.61; OR = 0.64, 95% CI: 0.43, 0.95) but higher risk of underweight (OR = 2.57, 95% CI: 1.20, 6.45) |
| Zhang et al. 2016 [48] | “Modern” DP with vegetables, milk, eggs, meat, wheat, beans, and fast food; “traditional” DP with wheat, cake, and oil; “tuber” DP with tubers, fruits, and cakes                                                                   | Cross sectional | 1,604 (41.4% males)  | Adults aged 18-80 years in the 2010–2012 National Nutrition Survey in Yunnan province           | Obesity, BMI, WC                                     | Age, sex, energy intake, physical activity, smoke, and drink                                                                                           | 3-d food recalls | Highest initial score and a slight decrease trajectory of the meat DP: higher risk of overweight/obesity (OR = 1.63; 95% CI: 1.04, 2.54); maintaining high Southern DP and modern DP scores: lower                                                                                                                                                                                                                                                                                                                                                                                                  |
| Zhang et al. 2021 [54] | Three trajectories of a “southern” DP with rice, vegetables, and pork and a “modern” DP with fruits, dairy, and processed food; four trajectories of a “meat” DP with organ meats,                                                  | Longitudinal    | 9,299 (49.6% males)  | Adults aged 18 years or older from the CHNS between 1991 and 2018                               | Overweight/obesity at each wave of survey collection | Baseline age, gender, living areas, individual income, education level, physical activity, smoking status, alcohol intake, energy intake, baseline BMI | 3-d food recalls |                                                                                                                                                                                                                                                                                                                                                                                                                                                                                                                                                                                                     |

|                      |                                                                                                                                                                                                                                                                                                                                    |                 |                     |                                                                              |                         |                                                                        |              |                                                                                                                                                           |
|----------------------|------------------------------------------------------------------------------------------------------------------------------------------------------------------------------------------------------------------------------------------------------------------------------------------------------------------------------------|-----------------|---------------------|------------------------------------------------------------------------------|-------------------------|------------------------------------------------------------------------|--------------|-----------------------------------------------------------------------------------------------------------------------------------------------------------|
|                      | poultry, pork and other livestock meat                                                                                                                                                                                                                                                                                             |                 |                     |                                                                              |                         |                                                                        |              | risk of overweight/obesity (OR = 0.64; 95% CI: 0.51, 0.81; OR = 0.71; 95% CI: 0.54, 0.91), (OR = 0.76; 95% CI: 0.63, 0.91; OR = 0.64; 95% CI: 0.44, 0.90) |
| Zou et al. 2017 [49] | "Cereal, animal, and plant food" DP with correlations with pork, vegetables, cereals, fish and shellfish; "high protein food" DP with milk and dairy products, eggs, fish, and shellfish; "plant food" DP with beans, fruits, and nuts; "poultry" DP with chicken and duck; "beverage" DP with carbonated beverage and fruit drink | Cross sectional | 1,613 (46.8% males) | Adults from cities, townships, and residential villages in Zhejiang Province | BMI, overweight/obesity | Gender, age, education, smoking, total energy intake, household income | 24-hr recall | Cereal, animal, and plant food as well as beverage DP: higher risk of obesity (OR = 2.924, 3.257; 95% CI: 1.147, 7.463; 1.372, 7.692)                     |

---

CHNS—China Health and Nutrition Survey; CI—confidence interval; DP—dietary pattern; FFQ—food frequency questionnaire; JIN—Jiangsu Nutrition Study; OR—odds ratio; PR—prevalence ratio; RRR—relative risk ratio; WC—waist circumference. ; “↑”—increase; “↓”—decrease
